# Supplementary material
Source: ML conference proceedings conference paper supplement (https://openaccess.thecvf.com/content/CVPR_2020/html/Clever_Bodies_at_Rest_CVPR_2020_paper.html)
Supplement: Supplementary file 1 [file Clever_Bodies_at_Rest_CVPR_2020_supplemental.zip]

Archive with 2 entries (2 files):
- 10031-supp/10031-appendix.pdf
- 10031-supp/10031-video.mp4
